# Supplementary material
Source: publisher site journal article supplement (https://www.dovepress.com/get_supplementary_file.php?f=463291.docx)
Supplement: Supplementary file 1 [file get_supplementary_file.php]

**Supplementary Materials**

**Table S1 Characteristics of the pharmacists**

|  | **Total (n=12)** |
| --- | --- |
| Age, median, year (range) | 36 (28-55) |
| Sex  male  female | 8  4 |
| Year of experience  median, year (range) | 13.0 (4.0-33.0) |
| Frequency of dispensing  once a week  more than twice a week | 8  4 |

**Table S2 Survey results of pharmacists**

| **Parameter** | **Hard-shelled arm**  Mean ± SD | **Soft-shelled arm**  Mean ± SD | **P-value** |
| --- | --- | --- | --- |
| Ease of drug injection | 6.00±1.13 | 4.83±1.75 | 0.1211 |
| Ease of viewing memory | 7.25±1.82 | 2.92±2.81 | 0.0010 |
| Overall satisfaction | 6.83±1.59 | 5.17±1.59 | 0.0352 |

Abbreviation: SD; standard deviation
